1

2 **Chronic Benzene Exposure Aggravates Pressure Overload-Induced Cardiac Dysfunction**

3 Igor N. Zelko<sup>1-4</sup>, Sujith Dassanayaka<sup>2,4</sup>, Marina V. Malovichko<sup>1-4</sup>, Caitlin M. Howard<sup>2-4</sup>, Lauren  
4 F. Garrett<sup>2-4</sup>, Uchida Shizuka<sup>1-3</sup>, Kenneth R. Brittian<sup>2-4</sup>, Daniel J. Conklin<sup>1-4</sup>, Steven P. Jones<sup>2-4</sup> and  
5 Sanjay Srivastava<sup>1-4</sup>

6

7 <sup>1</sup>University of Louisville Superfund Research Center, <sup>2</sup>Diabetes and Obesity Center, <sup>3</sup>Envirome  
8 Institute, and <sup>4</sup>Department of Medicine, Division of Environmental Medicine, University of  
9 Louisville, Louisville, KY 40202

10

11 Running Title: Benzene-induced cardiac dysfunction

12

13

14 Conflict of interest statement: The authors have declared that no conflict of interest exists

15

16

17

18 Address correspondence to: Igor N. Zelko, PhD  
19 Department of Medicine  
20 Division of Environmental Medicine  
21 Room 310 CII Building  
22 302 E. Muhammad Ali Blvd  
23 Louisville, KY 40202  
24 Phone: 502-852-9064  
25 E-mail: [igor.zelko@louisville.edu](mailto:igor.zelko@louisville.edu)

26

27

or

28

29 Sanjay Srivastava, PhD  
30 Superfund Research Center,  
31 Room 306 CII Building  
32 302 E. Muhammad Ali Blvd  
33 Louisville, KY 40202  
34 Phone: 502-852-5724; Fax: 502-852-5834  
35 E-mail: [sanjay@louisville.edu](mailto:sanjay@louisville.edu)

36 **ABSTRACT**

37 Benzene is a ubiquitous environmental pollutant abundant in household products, petrochemicals  
38 and cigarette smoke. Benzene is a well-known carcinogen in humans and experimental animals;  
39 however, little is known about the cardiovascular toxicity of benzene. Recent population-based  
40 studies indicate that benzene exposure is associated with an increased risk for heart failure.  
41 Nonetheless, it is unclear whether benzene exposure is sufficient to induce and/or exacerbate heart  
42 failure. We examined the effects of benzene (50 ppm, 6 h/day, 5 days/week, 6 weeks) or HEPA-  
43 filtered air exposure on transverse aortic constriction (TAC)-induced pressure overload in male  
44 C57BL/6J mice. Our data show that benzene exposure had no effect on cardiac function in the  
45 Sham group; however, it significantly compromised cardiac function as depicted by a significant  
46 decrease in fractional shortening and ejection fraction, as compared with TAC/Air-exposed mice.  
47 RNA-seq analysis of the cardiac tissue from the TAC/benzene-exposed mice showed a significant  
48 increase in several genes associated with adhesion molecules, cell-cell adhesion, inflammation,  
49 and stress response. In particular, neutrophils were implicated in our unbiased analyses. Indeed,  
50 immunofluorescence studies showed that TAC/benzene exposure promotes infiltration of  
51 CD11b<sup>+</sup>/S100A8<sup>+</sup>/myeloperoxidase<sup>+</sup>-positive neutrophils in the hearts by 3-fold. *In vitro*, the  
52 benzene metabolites, hydroquinone and catechol, induced the expression of P-selectin in cardiac  
53 microvascular endothelial cells by 5-fold and increased the adhesion of neutrophils to these  
54 endothelial cells by 1.5-2.0-fold. Benzene metabolite-induced adhesion of neutrophils to the  
55 endothelial cells was attenuated by anti-P-selectin antibody. Together, these data suggest that  
56 benzene exacerbates heart failure by promoting endothelial activation and neutrophil recruitment.

57 **Keywords:** Benzene, heart failure, adhesion molecules, endothelial cells, neutrophils, RNA-seq.

58

59

## 60 **Introduction**

61

62 Environmental pollution is a health problem worldwide. More than 9 million premature deaths are  
63 attributed to pollution every year, out of which 6 million deaths are related to air pollution (1).  
64 Nearly half of the air pollution-associated deaths are ascribed to cardiovascular disease (1).  
65 Cardiovascular health effects of criteria pollutants (particulate matter<sub>2.5</sub>, sulfur dioxide, carbon  
66 monoxide, nitrogen oxides, ozone and lead) have been extensively studied in the last three decades;  
67 however, information about the potential cardiovascular toxicity of other airborne chemicals, such  
68 as volatile organic compounds (e.g. benzene, 1,3-butadiene, vinyl chloride, trichloroethylene etc.),  
69 is sparse. Benzene, a well-known carcinogen, is abundant in household products, cigarette smoke  
70 and automobile exhaust (2-5), and the atmospheric concentration of benzene can exceed 50 ppm,  
71 especially near the emission source. People working at gasoline pumping stations or living near  
72 hazardous waste sites can be exposed to high levels of benzene. The United States Occupational  
73 Safety and Health Administration has set the occupational benzene exposure limit of 1 ppm (6);  
74 however, occupational benzene exposure in excess of 100 ppm has been reported in developing  
75 countries (7).

76 Like pollution, heart failure is a pervasive health problem. Heart failure affects more than 6.5  
77 million people in the United States (8) and 26 million people worldwide (9). The lifetime risk for  
78 heart failure at 40 years of age is estimated to be 1 in 5 people (10). The pathogenesis of heart  
79 failure is also not clearly understood, although a substantial body of literature points to the  
80 important role of infiltrating immune cells in the development of left ventricular hypertrophy and  
81 cardiac dysfunction (11-18). Therefore, the current focus in finding new therapeutic approaches to  
82 delay advanced heart failure includes understanding the molecular mechanisms that govern  
83 cardiomyocyte interactions with immune cells (19-21). The innate immune response induced by  
84 heart failure initiates the cardiac repair process, and involves infiltration of peripheral neutrophils  
85 (22-24).

86 Recent population based studies have reported that benzene exposure is associated with an  
87 increased risk for heart failure (25), and presence of mono-nitrogen oxide and benzene in the air  
88 of hospital wards is associated with a higher risk of heart failure morbidity (26). Other studies have  
89 linked exposure to benzene with cardiovascular mortality (27, 28); however, direct effects of

90 benzene exposure on heart failure in well-controlled animal studies have not been studied. Here,  
91 we examined the effect of chronic benzene exposure on transverse aortic constriction (TAC)-  
92 induced cardiac function and associated immune response in mice.

93

## 94 **MATERIALS AND METHODS**

95

96 **Reagents:** Benzene permeation tubes were obtained from Kin-Tek (La Marque, TX). Primers and  
97 probes for real-time PCR were purchased from Integrated DNA Technologies (Coralville, IA) and  
98 ThermoFisher Scientific (Waltham, MA). Sources of antibodies used for immunohistochemistry  
99 and functional studies were: anti-CD11b, myeloperoxidase (Abcam); anti-S100A8 (63N13G5)-  
100 FITC from Novus (Novus, Centennial, CO); anti-CD90/Thy1 from Sino Biological (Sino  
101 Biological); CD62P from Biolegend (San Diego, CA). Murine cardiac microvascular endothelial  
102 cells (CMVEC) were obtained from CellBiologics, Chicago, IL. All other chemicals and enzymes  
103 were from Sigma Chemical Co. (St. Louis, MO), or Invitrogen (Carlsbad, CA).

104

105 **Animal housing and maintenance:** C57BL/6J male mice obtained from Jackson Laboratory (Bar  
106 Harbor, ME) were maintained on normal chow in a pathogen-free facility accredited by the  
107 Association for Assessment and Accreditation of Laboratory Animal Care. All procedures were  
108 approved by the University of Louisville Institutional Animal Care and Use Committee.

109

110 **Animal Surgeries:** For TAC (29), male C57BL/6J mice 12 weeks of age were anesthetized  
111 (intraperitoneal injections of 50 mg/kg sodium pentobarbital and 50 mg/kg ketamine  
112 hydrochloride), antiseptically prepared for surgery, orally intubated, and ventilated (oxygen  
113 supplement to the room-air inlet) with a mouse ventilator (Hugo Sachs). Core body temperature  
114 was maintained at 36.5–37.5°C with an automatic, electronically regulated heat lamp. The aorta  
115 was visualized following an intercostal incision. A 7-0 nylon suture was looped around the aorta  
116 between the brachiocephalic and left common carotid arteries. The suture was tied around a 27-  
117 gauge needle placed adjacent to the aorta to constrict the aorta to a reproducible diameter. The  
118 needle was removed, and the chest was closed in layers. Mice were extubated upon recovery of  
119 spontaneous breathing. Analgesia (ketoprofen, 5 mg/kg) was provided prior to recovery and by 24

120 and 48 h post-surgery. Sham mice were subjected to the same procedure as the TAC cohort except  
121 the suture was not tied.

122

123 **Benzene Exposure:** One week after the TAC, mice were exposed to benzene for 6 weeks in  
124 bedding-free cages as described before (30). Briefly, benzene atmospheres were generated from  
125 liquid benzene (Sigma-Aldrich) in a KIN-TEK Analytical, Inc permeation tube. A carrier gas (N<sub>2</sub>)  
126 was delivered to the permeation tube at 100 ml/min and diluted with HEPA- and charcoal-filtered  
127 room air (3 L/min) and diluted gas directed to an exposure unit. Flow was distributed through a  
128 fine mesh screen of a custom cyclone-type top (Teague Enterprises) that distributed air within 10%  
129 of the mean concentration at six locations in the cage. Throughout the exposure, benzene  
130 concentrations were continuously monitored using an in-line photoionization detector (ppb RAE:  
131 Rae Industries) upstream of the exposure unit. Mice were exposed to 50 ppm benzene (6 h/day, 5  
132 days/week) for 6 weeks. Mice exposed to HEPA- and charcoal-filtered room air only were used as  
133 controls.

134

135 **Echocardiography:** At the end of the benzene exposure protocol, mice were anesthetized with  
136 2% isoflurane, and echocardiography was performed (VisualSonics Vevo 3100), similar to our  
137 previous reports (29, 31). At the end of the experiment, hearts were excised for biochemical and  
138 pathological analyses. For mice in the TAC arm of the study, Doppler verification of the stenosis  
139 was used. The sonographer was blinded to the specific experimental group.

140

141 **RNA Isolation and RNAseq analysis:** Total RNA was extracted from the hearts of mice using  
142 TRIzol kit (Thermo Fisher Scientific, MA, USA), and the purity of RNA was analyzed using  
143 NanoDrop One (ThermoScientific, MA, USA). RNA quality was measured by Agilent 2100  
144 bioanalyzer (Thermo Fisher Scientific, MA, USA) and samples with high RNA integrity were used  
145 for subsequent RNAseq analysis. RNA samples were processed by Novogene using mRNA and  
146 small RNA sequencing services (Novogene, Beijing, China). The resultant raw reads of the  
147 FASTQ files were processed and quality metrics were visualized using FastQC v 0.11.9. The  
148 mRNA differentially regulated genes (DEG) and pathway enrichment analysis were performed  
149 using the NGS Data Analysis pipeline (32).

150

151 **Histopathology:** Formalin-fixed, paraffin-embedded hearts from Sham and TAC mice were  
152 sectioned at 4  $\mu\text{m}$  thickness, and later deparaffinized, and rehydrated according to the appropriate  
153 staining method. The histological staining was performed as previously described (33, 34). Picro-  
154 Sirius Red staining was used to evaluate tissue fibrosis and general histology, and Alexa Fluor  
155 555-conjugated wheat-germ agglutinin (Invitrogen) staining was used to determine the average  
156 myocyte area. All images were captured at 20X magnification using the Keyence BZ-X810, all in  
157 one fluorescent microscope. Both fibrosis and myocyte area were analyzed using the hybrid cell  
158 count feature (BZ-H4C) associated with the Keyence system. Fibrosis was expressed as a  
159 percentage of scar tissue divided by the total area of tissue.

160

161 **Immunofluorescence:** For immunostaining, deparaffinized and rehydrated sections were  
162 incubated for 20 min with 10 mmol/L citric acid pH 6.0 (pH 9.0 for MPO staining). Nonspecific  
163 binding was blocked with 5% normal goat serum and 0.05% saponin (Sigma) in PBS (pH 7.4) for  
164 30 min. Sections were blocked and then incubated with the appropriate primary antibody in PBS  
165 with 1% BSA and 0.05% saponin for 1 h at 37°C against: CD11b (Abcam), S100A8-FITC  
166 (Novus), myeloperoxidase (Abcam). Tissue sections were then incubated for 30 min at room  
167 temperature with respective secondary antibodies conjugated with Alexa 488, 555, or 647  
168 (Invitrogen), and counterstained with DAPI to label nuclei. Images were made with a 20x and 60x  
169 objective.

170

171 **Neutrophils isolation:** Neutrophils were isolated from bone marrow as described previously (35).  
172 Briefly, C57BL6/J male mice 10 weeks old were sacrificed using pentobarbital injection. Bone  
173 marrow cells were flushed from the femur and tibia and filtered through a 70  $\mu\text{m}$  mesh filter. For  
174 a negative selection of neutrophils, we used a Neutrophil Isolation kit from Miltenyi, Auburn, CA.  
175 Magnetic sorting was performed using MS columns. Neutrophils presented in flow-through  
176 fractions were characterized using flow cytometry and by cytospin with Diff-Quick staining.  
177 Neutrophil purity was always higher than 93%.

178

179 **Cell adhesion assay:** Neutrophil adhesion to CMVEC was determined as previously described  
180 (36). Briefly, CMVEC (passage 6 to 10) were seeded into 96-well plate at 25,000 cells per well in  
181 100  $\mu\text{l}$  of growth media. Twenty-four hours later confluent monolayer of endothelial cells was

182 exposed to benzene metabolite catechol (5  $\mu$ M) for 24 hours. Cells treated with TNF $\alpha$  (100 ng/mL)  
183 for 4 hours served as positive controls. Isolated neutrophils labeled with calcein (36) were added  
184 to endothelial cells and incubated for 30 min at 37 °C. Cells were rinsed with PBS containing Mg<sup>2+</sup>  
185 and Ca<sup>2+</sup> and the fluorescence was measured with a Synergy H1 (Biotek) fluorescence plate reader  
186 (excitation wavelength, 485 nm and emission wavelength, 520 nm). To measure the effect of p-  
187 selectin blocking on neutrophil adhesion, CMVEC were incubated with anti-CD62P antibodies  
188 (25  $\mu$ g/mL) for 30 min prior to the neutrophil adhesion assay. For each assay, 10-12 wells were  
189 used.

190

191 **Statistical Analyses:** Data are presented as means  $\pm$  SEM. The statistical significance of  
192 differences was determined by t-test. A one-way analysis of variance (ANOVA) with Holm-Sidak  
193 *post hoc* test was used to compare differences between multiple treatment groups. P-value of <0.05  
194 indicated statistically significant differences. All analyses were performed using Excel and  
195 GraphPad Prism software (GraphPad Software, San Diego, CA). Statistical analyses for echo-  
196 based parameters were performed after adjustment for body weight and heart rate by two-way  
197 ANOVA with Tukey-Kramer corrections.

198

## 199 RESULTS

200 **Benzene exposure exacerbates pressure overload-induced cardiac dysfunction:** As expected,  
201 mice in the TAC/Air group developed significant left ventricular dilation as indicated by a  
202 significant increase in end diastolic volume (EDV), end systolic volume (ESV) and left ventricular  
203 internal diameter in diastole (LVIDd), and diameter in systole (LVIDs), and consequent decrease  
204 in fractional shortening (FS) and ejection fraction (EF), as compared with the mice in  
205 corresponding Sham/Air (**Fig. 1**). TAC also increased the heart mass, cardiac myocyte size and  
206 fibrosis in the heart (**Fig. 1**). This was accompanied with a significant increase in the fluid  
207 accumulation in the lung (**Supplemental Fig. 1**). Benzene exposure had no effect on myocyte size  
208 and cardiac function in the Sham group; however, it significantly compromised cardiac function  
209 as depicted by a significant increase in EDV, ESV, LVIDd, and LVIDs and resultant decrease in  
210 FS and EF, as compared with TAC/Air-exposed mice (**Fig. 1** and **Supplemental Table 1**). The  
211 other cardiac function parameters such as left ventricular anterior wall thickness at diastole or  
212 systole (LVAWd and LVAWs) and left ventricular posterior wall thickness at diastole or systole

213 (LVPWd and LVPWs), isovolumic relaxation time (IVRT), Stroke Volume (SV), and Cardiac  
214 Output (CO) did not significantly change in TAC/Benzene vs TAC/Air groups (**Supplemental**  
215 **Table 1**). Cardiac myocyte size and fibrosis in TAC/Benzene-exposed mice were also comparable  
216 with the TAC/Air-exposed mice. Collectively, these data suggest that a 6-week benzene exposure  
217 exacerbates TAC-induced cardiac dysfunction but does not induce cardiac remodeling in Sham  
218 mice.

219

220 **RNA-Seq analyses of TAC-benzene-exposed hearts:** To examine the molecular mechanisms by  
221 which benzene worsens cardiac function following TAC, we performed deep RNA sequencing on  
222 the left ventricle and septum tissues. For these analyses, we used  $FDR \leq 0.01$  and  $0.5 \leq \text{Log}_2$  (fold  
223 change)  $\leq -0.5$  to examine the differential expression of the genes. As shown in **Fig 2A**, TAC  
224 upregulated 671 genes (e.g., genes involved in extracellular matrix organization and collagen  
225 formation) and downregulated 351 genes (e.g., genes involved in muscle contraction and cardiac  
226 conduction) in the air-exposed mice (see **Supplemental Table 1**). Exposure to benzene in Sham-  
227 operated mice did not induce any genes while uteroglobin (*Scgbl1*) and surfactant protein C  
228 (*Sftpc*) were downregulated by 8.9- and 6.1-fold. However, benzene exposure in TAC mice  
229 significantly upregulated 876 genes and downregulated 674 genes as compared with the  
230 corresponding Sham-operated controls. Comparison of the gene expression between  
231 TAC/Benzene versus TAC/Air mice showed upregulation of 50 and downregulation of 69 genes.  
232 **Fig. 2B** illustrates the heat-map of top the 15 upregulated and 10 downregulated genes between  
233 these groups as well as the differential expression of these genes in the other experimental groups.  
234 Gene ontology of biological process and molecular function enrichment analyses of differentially  
235 expressed genes in the benzene-exposed TAC hearts show significant enrichment of the genes  
236 associated with the regulation of “neutrophil degranulation”, “signaling by interleukins”,  
237 “extracellular matrix organization”, “platelet degranulation”, and heat shock factor-1 (HSF-1) -  
238 dependent transactivation etc. (**Fig. 3A**). **Fig. 3B** shows the induction of some representative genes  
239 of these processes, and **Fig. 3C** displays the gene-concept network of select differentially  
240 expressed genes associated with the indicated biological pathways including neutrophil  
241 degranulation, interleukin signaling, and HSF-1 activation.

242



243 **Benzene exposure augments TAC-induced neutrophil infiltration:** Because our RNA-Seq data  
244 suggest that benzene exposure affects inflammatory response and neutrophil degranulation  
245 processes in TAC hearts, we examined the abundance of inflammatory cells in the TAC/benzene-  
246 exposed hearts. As shown in **Fig. 4A**, benzene exposure induced massive infiltration of S100A8-  
247 positive granulocytes in the hearts of TAC mice. These cells also co-stained with the pan-myeloid  
248 marker CD11b and myeloperoxidase, mostly expressed on neutrophils (**Fig. 4A and 4B**).  
249 Quantitative analysis shows >3-fold increase in S100A8<sup>+</sup> granulocytes, CD11b<sup>+</sup> myeloid cells and  
250 myeloperoxidase<sup>+</sup> neutrophils in TAC/Benzene vs TAC/Air groups (**Fig. 4C**). The S100A8  
251 staining did not co-localize with the markers of CD68<sup>+</sup> macrophages and Thy1<sup>+</sup> fibroblasts in  
252 TAC-Benzene hearts (**Supplemental Fig. 2**). To examine the mechanisms by which benzene  
253 exposure augments neutrophil infiltration in TAC-instrumented hearts, we analyzed the RNA-seq  
254 data for the differential expression of adhesion molecules. As shown in **Fig. 4D**, benzene exposure  
255 did not affect the levels of adhesion molecules in the Sham-operated hearts, however, it  
256 significantly increased the transcription of Intracellular adhesion molecule-1 (*Icam1*), endothelial-  
257 selectin (*Sele*), and platelet-selectin (*Selp*) genes in the TAC-instrumented hearts. Expression of  
258 vascular cell adhesion molecule (*Vcam1*) in TAC-benzene hearts was comparable with the  
259 TAC/Air hearts. Together, these data indicate that chronic benzene exposure enhances the  
260 infiltration of neutrophils, possibly by activating adhesion molecules in the myocardial endothelial  
261 cells during pressure overload-induced cardiac dysfunction.

262  
263 **P-Selectin facilitates the adhesion of neutrophils to the cardiac microvascular**  
264 **endothelial cells:** Complimentary *in vitro* experiments with CMVEC showed that benzene  
265 metabolites hydroquinone (5  $\mu$ M, 24 h) and catechol (5  $\mu$ M, 24 h) increased the transcription of  
266 P-selectin by 5-fold (**Fig. 5A**) and abundance of P-selectin protein by 1.5-2-fold (**Fig. 5B**).  
267 Incubation of CMVEC with catechol for 24 h augmented the adhesion of bone marrow-derived  
268 neutrophils to CMVEC (**Fig. 5C**), which was attenuated by pre-incubation of CMVEC with anti-  
269 P-selectin antibody (**Fig. 5D**). Hydroquinone and catechol also increased the expression of  
270 interleukin-8 (IL8, **Supplemental Fig. 3**), which can function both as a membrane-bound and  
271 soluble activator of neutrophil  $\beta_2$  integrin-mediated adhesion. Together, these observations suggest  
272 that benzene-induced neutrophil infiltration in the TAC hearts could be facilitated, at least in part,  
273 by the metabolic conversion of benzene to its active metabolites- hydroquinone and catechol.

274 **DISCUSSION**

275

276 The major finding of this study is that chronic benzene exposure exacerbates pressure overload-  
277 induced cardiac dysfunction. The TAC/Benzene-induced cardiac dysfunction is accompanied by  
278 endothelial activation and enhanced recruitment of granulocytes in the heart and differential  
279 regulation of genes involved in neutrophil degranulation, inflammatory signaling, and stress  
280 response. These studies corroborate recent reports that occupational and environmental exposure  
281 to benzene is associated with an increased risk for heart failure (25).

282 Inflammatory processes have long been implicated in the manifestation, progression, and  
283 consequences of ischemic heart disease (37, 38) and pressure- or volume overload-induced  
284 mechanical stress (17, 39-41). Pressure overload induces the expression of *ICAMI* (42) and  
285 consequent increase in the recruitment of neutrophils in the heart (39) and subsequent monocyte  
286 infiltration (17, 39). It diminishes TAC-induced cardiac hypertrophy and inflammation and  
287 sustains cardiac function (39), suggesting that neutrophils play a pivotal role in the manifestation  
288 of heart disease, especially heart failure. In mice, increased recruitment of S100A9 positive  
289 granulocytes, which co-stained with myeloperoxidase, suggests that TAC/Benzene exposure  
290 facilitates the infiltration of neutrophils into the hearts.

291 This is further supported by RNAseq data of cardiac tissue, demonstrating robust induction in the  
292 neutrophil specific *S100A8/A9*, *Mmp8*, *Lcn2*, and *Cxcr2* transcripts. S100A8/A9 is a member of  
293 alarmins or damage-associated molecular patterns (DAMPs) that are released by the failing heart  
294 (43-45) and subsequently activate resident macrophages, fibroblasts, and endothelial cells to  
295 secrete proinflammatory cytokines and adhesion molecules (46) and augment inflammation in the  
296 cardiac tissue (21, 23, 47). Systemic administration of S100A8/A9 facilitates the mobilization of  
297 neutrophils from the bone marrow (48) while local administration of S100A8/A9 leads to rapid  
298 recruitment of monocytes and neutrophils into the site of injury (49). Patients with myocardial  
299 infarction and elevated S100A8/A9 levels have poorer prognosis (50, 51). Overall, increased  
300 neutrophil infiltration in the hearts could play a pivotal role in benzene exposure-induced cardiac  
301 dysfunction in the pressure overload hearts.

302 Although precise mechanisms by which benzene exposure exacerbates pressure overload-induced  
303 cardiac dysfunction remain unknown, it is plausible that the observed enlargement of left ventricle

304 dimensions in the hearts of TAC/Benzene mice could, at least in part, be due to the induction of  
305 neutrophil gelatinase-associated lipocalin (NGAL or Lcn2) whose expression is regulated by the  
306 S100A8/A9 complex (52). Lcn2 plays a central role in the ontogeny of cardiac hypertrophy and  
307 heart failure (53-55) and can bind Mmp9 to create a complex to stabilize Mmp9 protein and  
308 enhance metalloproteinase activity with its pro-angiogenic and pro-invasive properties (56, 57).  
309 Moreover, S100A8/A9 can diminish cardiac myocyte contractility, resulting in attenuated cardiac  
310 ejection fraction (58). Patients of chronic heart failure have elevated plasma myeloperoxidase  
311 levels (59), and pharmacological inhibition of myeloperoxidase diminishes leukocyte recruitment,  
312 and improves ejection fraction, end diastolic/systolic volume, and left ventricular hypertrophy  
313 following myocardial infarction (60). Therefore, it is conceivable that the augmented neutrophil  
314 infiltration with subsequent release of MPO and S100A8/A9 heterodimer from activated  
315 granulocytes might affect myocyte contractility and compromise cardiac function in TAC/Benzene  
316 mice.

317 Increased inflammation in the hearts of mice subjected to pressure overload followed by benzene  
318 exposure is further underscored by the increased transcription of chemokines, cytokines, and their  
319 receptors (e.g.  $Il1\beta$ , *Cxcl1*, and *Cxcr2*). Chemokines such as CXCL1 chemokine are well known  
320 to facilitate neutrophil migration into inflamed tissues (61), promote angiogenesis (62, 63) and  
321 regulate the recruitment of neutrophils and monocytes during cardiac remodeling and  
322 inflammation (64). Although the cellular sources (e.g., endothelial cells, granulocytes) of CXCL1  
323 and other chemokines and cytokines in the hearts of TAC/benzene-exposed mice remain unknown,  
324 they likely augment neutrophil recruitment and migration. Benzene metabolites have been shown  
325 to increase the expression of cytokines and chemokines in the peripheral blood mononuclear cells  
326 (65) and endothelial cells (66). Our *in vitro* studies show that in murine cardiac microvascular  
327 endothelial cells, benzene metabolites hydroquinone and catechol increase the transcription of  
328 chemokine IL-8, which is known to bind to CXCR2 on neutrophils and trigger a signaling cascade  
329 that facilitates a firm monocyte adhesion with subsequent intravasation (67). Further studies are  
330 required to delineate the sources of chemokines and cytokines and the molecular mechanisms by  
331 which these molecules promote inflammatory signaling in the hearts of TAC/Benzene mice.

332 Induction of heat shock proteins (HSPs) such as *Hspa1a* and *Hspa1b* in Sham/Benzene hearts  
333 appears to be an adaptive response to circumvent inflammatory signaling. Induction of HSPs in  
334 response to chemical and mechanical stress enhances protein folding, inhibits inflammation and

335 apoptosis, and provides cytoskeletal protection (68). While little is known about the role of HSPs  
336 in pressure overload-induced heart failure, heat shock factor 1 (HSF-1), the transcription factor  
337 that regulates HSPs is induced by TAC in rats and mice, and constitutive activation of HSF-1  
338 ameliorates TAC-induced cardiac hypertrophy, fibrosis and cardiac dysfunction (69-71).  
339 Conversely, inhibition of HSF-1 impairs cardiac function in the pressure overload subjected hearts  
340 (69, 70). The HSF-1-mediated cardiac adaptation from pressure overload has been attributed, at  
341 least in part, to myocardial angiogenesis via suppression of p53 and subsequent induction of HSF-  
342 1 (72). HSF-1 can also improve endothelial function (73) and prevent inflammatory signaling (74).  
343 Although the contribution of the HSF-1/HSP axis in the etiology of cardiac dysfunction following  
344 TAC/Benzene exposure is unclear, it is likely that these pathways are activated to prevent benzene-  
345 induced endothelial activation. Further studies are required to examine the molecular mechanisms  
346 by which HSF-1-dependent transactivation prevents endothelial activation.

347 Collectively, our studies demonstrate that benzene exposure worsens pressure overload-induced  
348 cardiac dysfunction, which is accompanied by increased influx of neutrophils, alterations in cell-  
349 cell adhesion, and induction of genes associated with inflammation and stress response. These  
350 studies establish the plausibility that benzene exposure is sufficient to exacerbate TAC-induced  
351 cardiac dysfunction and provide insight about the underlying mechanisms.

352

353 **Acknowledgment:** This study was supported in parts by NIH grants P42 ES023716, R01  
354 HL149351, R01 HL137229, R01 HL146134, R01 HL156362, R01 HL138992, R01 HL122676,  
355 R21 ES033323, U54 HL120163, P30 GM127607, NIH S10 OD025178, and the Jewish Heritage  
356 Foundation grant OGMN190574L.

357

358

359

360

361

362

363 FIGURE LEGENDS:

364 **Figure 1. Effect of benzene exposure on left ventricle function and cardiac remodeling after**  
365 **pressure overload. A.** Benzene exposure protocol: Transverse aortic constriction or Sham operated  
366 male C57BL/6 mice were exposed to benzene (50 ppm, 6 h/day, 5 days/week) or HEPA-filtered  
367 air (Air) for 6 weeks. At the end of the exposure protocol, echocardiography was used to measure  
368 ejection fraction (**B**), fractional shortening (**C**), end-diastolic volume (EDV; **D**), end-systolic  
369 volume (ESV; **E**), left ventricular internal diameter end diastole (LVIDd; **F**) and end systole  
370 (LVIDs; **G**). Heart weight:tibial length (TL) are presented in panel **H**. Panel **I** shows the  
371 representative images of Sirius Red-stained mid-ventricular histological sections from mouse  
372 hearts with quantitative analysis of fibrosis expressed as percent of fibrous area to total area ratio.  
373 Representative images of wheat germ agglutinin (WGA)-stained mid-ventricular histological  
374 sections from mouse hearts with quantitative analysis of myocyte area are illustrated in panel **J**.  
375 Values are mean  $\pm$  SEM. \* $p < 0.05$ , \*\* $p < 0.01$ , \*\*\* $p < 0.001$ , and \*\*\*\* $p < 0.0001$  represent statistical  
376 significance between corresponding groups analyzed by One-way ANOVA. N=6-11/group.

377

378 **Figure 2. Differential expression of genes (DEG) in the hearts of TAC/Benzene-exposed mice.**  
379 **A.** The number of differentially expressed genes (DEG) are depicted by corresponding arrows.  
380 The visual representation of DEG for three treatments are presented as volcano plots ( $FDR \leq 0.01$ ).  
381 **B.** Heatmap of the top 15 up-regulated and 10 down-regulated (TAC/Benzene vs. TAC/Air)  
382 protein-encoding genes in the four experimental groups.

383

384 **Figure 3. Pathway enrichment analysis of differentially expressed genes in the hearts of**  
385 **TAC/Benzene-exposed mice. A.** Dot plot of enriched terms for TAC/Benzene vs TAC/Air DEG  
386 ( $FDR \leq 0.01$ ). IGF – Insulin-like Growth Factor, IGFBPs – Insulin-like Growth Factor Binding  
387 Proteins; **B.** The most upregulated and functionally important genes in TAC/Benzene vs TAC/Air  
388 groups. **C.** Gene-concept network depicting the linkage of genes and enriched biological pathways  
389 as a network.

390

391 **Figure 4. Immune cells infiltration into the heart of TAC/Benzene-exposed mice. A.** Heart  
392 sections were stained for S100A8 (green) and CD11b (pink), nuclei (blue); **B.** Co-staining of  
393 S100A8 positive cells with myeloperoxidase (MPO) positive cells. **C.** Quantitative analysis of

394 S100A8-, CD11b-, and MPO-positive cells. **D.** Expression levels of adhesion genes in the hearts  
395 of exposed mice. Values are mean  $\pm$  SEM. \* $p < 0.05$ , \*\* $p < 0.01$  and \*\*\* $p < 0.001$  represent statistical  
396 significance between corresponding groups analyzed by One-way ANOVA. N=6/group.

397

398 **Figure 5. Benzene metabolites induce neutrophil adhesion to the cardiac microvascular**  
399 **endothelial cells. A.** Transcription of P-selectin (*Selp*) in cardiac microvascular endothelial cells  
400 (CMVEC) treated with benzene metabolites hydroquinone (HQ; 5  $\mu$ M, 6 h) and catechol (5  $\mu$ M,  
401 24 h). **B.** HQ (5  $\mu$ M, 24 h)- and catechol (5  $\mu$ M, 24 h)-induced upregulation of P-selectin protein  
402 in CMVEC. **C.** Adhesion of bone marrow-derived calcein-labeled murine neutrophils to CMVEC  
403 pretreated with HQ (5  $\mu$ M) and Catechol (5  $\mu$ M) for 24 hours. **D.** Inhibition of neutrophil adhesion  
404 to HQ (5  $\mu$ M, 24 h)- and catechol (5  $\mu$ M, 24 h)-stimulated CMVEC by anti-P-selectin antibody.  
405 Values are mean  $\pm$  SEM. \* $p < 0.05$ , \*\* $p < 0.01$ , \*\*\* $p < 0.001$ , and \*\*\*\* $p < 0.0001$  between  
406 corresponding groups analyzed by One-way ANOVA.

407

408

409

410

411

412

413

414

415

416

417

418

419

420

421

## 422 REFERENCES

- 423 1. Collaborators, G.B.D.R.F. (2016) Global, regional, and national comparative risk assessment of 79  
424 behavioural, environmental and occupational, and metabolic risks or clusters of risks, 1990-  
425 2015: a systematic analysis for the Global Burden of Disease Study 2015. *Lancet*. **388**(10053): p.  
426 1659-1724.
- 427 2. Clayton, C.A., E.D. Pellizzari, R.W. Whitmore, R.L. Perritt, and J.J. Quackenboss (1999) National  
428 Human Exposure Assessment Survey (NHEXAS): distributions and associations of lead, arsenic  
429 and volatile organic compounds in EPA region 5. *J Expo Anal Environ Epidemiol*. **9**(5): p. 381-392.
- 430 3. Fraser, M.P., G.R. Cass, and B.R.T. Simoneit (1998) Gas-phase and particle-phase organic  
431 compounds emitted from motor vehicle traffic in a Los Angeles roadway tunnel. *Environmental*  
432 *Science & Technology*. **32**(14): p. 2051-2060.
- 433 4. Jacob, P., 3rd, A.H. Abu Raddaha, D. Dempsey, C. Havel, M. Peng, L. Yu, and N.L. Benowitz (2013)  
434 Comparison of nicotine and carcinogen exposure with water pipe and cigarette smoking. *Cancer*  
435 *Epidemiol Biomarkers Prev*. **22**(5): p. 765-772.
- 436 5. Appel, B.R., G. Guirguis, I.S. Kim, O. Garbin, M. Fracchia, C.P. Flessel, K.W. Kizer, S.A. Book, and  
437 T.E. Warriner (1990) Benzene, benzo(a)pyrene, and lead in smoke from tobacco products other  
438 than cigarettes. *Am J Public Health*. **80**(5): p. 560-564.
- 439 6. Smith, M.T. (2010) Advances in understanding benzene health effects and susceptibility. *Annu*  
440 *Rev Public Health*. **31**: p. 133-148 132 p following 148.
- 441 7. Wong, O. and H. Fu (2005) Exposure to benzene and non-Hodgkin lymphoma, an epidemiologic  
442 overview and an ongoing case-control study in Shanghai. *Chem Biol Interact*. **153-154**: p. 33-41.
- 443 8. Benjamin, E.J., M.J. Blaha, S.E. Chiuve, M. Cushman, S.R. Das, R. Deo, S.D. de Ferranti, J. Floyd,  
444 M. Fornage, C. Gillespie, C.R. Isasi, M.C. Jimenez, L.C. Jordan, S.E. Judd, D. Lackland, J.H.  
445 Lichtman, L. Lisabeth, S. Liu, C.T. Longenecker, R.H. Mackey, K. Matsushita, D. Mozaffarian, M.E.  
446 Mussolino, K. Nasir, R.W. Neumar, L. Palaniappan, D.K. Pandey, R.R. Thiagarajan, M.J. Reeves,  
447 M. Ritchey, C.J. Rodriguez, G.A. Roth, W.D. Rosamond, C. Sasson, A. Towfighi, C.W. Tsao, M.B.  
448 Turner, S.S. Virani, J.H. Voeks, J.Z. Willey, J.T. Wilkins, J.H. Wu, H.M. Alger, S.S. Wong, P.  
449 Muntner, C. American Heart Association Statistics, and S. Stroke Statistics (2017) Heart Disease  
450 and Stroke Statistics-2017 Update: A Report From the American Heart Association. *Circulation*.  
451 **135**(10): p. e146-e603.
- 452 9. Ponikowski, P., S.D. Anker, K.F. AlHabib, M.R. Cowie, T.L. Force, S. Hu, T. Jaarsma, H. Krum, V.  
453 Rastogi, L.E. Rohde, U.C. Samal, H. Shimokawa, B. Budi Siswanto, K. Sliwa, and G. Filippatos  
454 (2014) Heart failure: preventing disease and death worldwide. *ESC Heart Fail*. **1**(1): p. 4-25.
- 455 10. Lloyd-Jones, D.M., M.G. Larson, E.P. Leip, A. Beiser, R.B. D'Agostino, W.B. Kannel, J.M. Murabito,  
456 R.S. Vasan, E.J. Benjamin, D. Levy, and S. Framingham Heart (2002) Lifetime risk for developing  
457 congestive heart failure: the Framingham Heart Study. *Circulation*. **106**(24): p. 3068-3072.
- 458 11. Kain, D., U. Amit, C. Yagil, N. Landa, N. Naftali-Shani, N. Molotski, V. Aviv, M.S. Feinberg, O.  
459 Goitein, T. Kushnir, E. Konen, F.H. Epstein, Y. Yagil, and J. Leor (2016) Macrophages dictate the  
460 progression and manifestation of hypertensive heart disease. *Int J Cardiol*. **203**: p. 381-395.
- 461 12. Liao, X., Y. Shen, R. Zhang, K. Sugi, N.T. Vasudevan, M.A. Alaiti, D.R. Sweet, L. Zhou, Y. Qing, S.L.  
462 Gerson, C. Fu, A. Wynshaw-Boris, R. Hu, M.A. Schwartz, H. Fujioka, B. Richardson, M.J. Cameron,  
463 H. Hayashi, J.S. Stamler, and M.K. Jain (2018) Distinct roles of resident and nonresident  
464 macrophages in nonischemic cardiomyopathy. *Proc Natl Acad Sci U S A*. **115**(20): p. E4661-  
465 E4669.
- 466 13. Marinkovic, G., H. Grauen Larsen, T. Yndigegn, I.A. Szabo, R.G. Mares, L. de Camp, M. Weiland, L.  
467 Tomas, I. Goncalves, J. Nilsson, S. Jovinge, and A. Schiopu (2019) Inhibition of pro-inflammatory

- 468 myeloid cell responses by short-term S100A9 blockade improves cardiac function after  
469 myocardial infarction. *Eur Heart J.* **40**(32): p. 2713-2723.
- 470 14. Nahrendorf, M., F.K. Swirski, E. Aikawa, L. Stangenberg, T. Wurdinger, J.L. Figueiredo, P. Libby, R.  
471 Weissleder, and M.J. Pittet (2007) The healing myocardium sequentially mobilizes two  
472 monocyte subsets with divergent and complementary functions. *J Exp Med.* **204**(12): p. 3037-  
473 3047.
- 474 15. Patel, B., M.A. Ismahil, T. Hamid, S.S. Bansal, and S.D. Prabhu (2017) Mononuclear Phagocytes  
475 Are Dispensable for Cardiac Remodeling in Established Pressure-Overload Heart Failure. *PLoS*  
476 *One.* **12**(1): p. e0170781.
- 477 16. Sager, H.B., M. Hulsmans, K.J. Lavine, M.B. Moreira, T. Heidt, G. Courties, Y. Sun, Y. Iwamoto, B.  
478 Tricot, O.F. Khan, J.E. Dahlman, A. Borodovsky, K. Fitzgerald, D.G. Anderson, R. Weissleder, P.  
479 Libby, F.K. Swirski, and M. Nahrendorf (2016) Proliferation and Recruitment Contribute to  
480 Myocardial Macrophage Expansion in Chronic Heart Failure. *Circ Res.* **119**(7): p. 853-864.
- 481 17. Weisheit, C., Y. Zhang, A. Faron, O. Kopke, G. Weisheit, A. Steinstrasser, S. Frede, R. Meyer, O.  
482 Boehm, A. Hoeft, C. Kurts, and G. Baumgarten (2014) Ly6C(low) and not Ly6C(high)  
483 macrophages accumulate first in the heart in a model of murine pressure-overload. *PLoS One.*  
484 **9**(11): p. e112710.
- 485 18. Bajpai, G., C. Schneider, N. Wong, A. Bredemeyer, M. Hulsmans, M. Nahrendorf, S. Epelman, D.  
486 Kreisel, Y. Liu, A. Itoh, T.S. Shankar, C.H. Selzman, S.G. Drakos, and K.J. Lavine (2018) The human  
487 heart contains distinct macrophage subsets with divergent origins and functions. *Nat Med.*  
488 **24**(8): p. 1234-1245.
- 489 19. Weinberger, T. and C. Schulz (2015) Myocardial infarction: a critical role of macrophages in  
490 cardiac remodeling. *Front Physiol.* **6**: p. 107.
- 491 20. Halade, G.V., V. Kain, and K.A. Ingle (2018) Heart functional and structural compendium of  
492 cardiosplenic and cardiorenal networks in acute and chronic heart failure pathology. *Am J*  
493 *Physiol Heart Circ Physiol.* **314**(2): p. H255-H267.
- 494 21. Martini, E., P. Kunderfranco, C. Peano, P. Carullo, M. Cremonesi, T. Schorn, R. Carriero, A.  
495 Termanini, F.S. Colombo, E. Jachetti, C. Panico, G. Faggian, A. Fumero, L. Torracca, M. Molgora, J.  
496 Cibella, C. Pagiatakis, J. Brummelman, G. Alvisi, E.M.C. Mazza, M.P. Colombo, E. Lugli, G.  
497 Condorelli, and M. Kallikourdis (2019) Single-Cell Sequencing of Mouse Heart Immune Infiltrate  
498 in Pressure Overload-Driven Heart Failure Reveals Extent of Immune Activation. *Circulation.*  
499 **140**(25): p. 2089-2107.
- 500 22. Ma, Y., A. Yabluchanskiy, R.P. Iyer, P.L. Cannon, E.R. Flynn, M. Jung, J. Henry, C.A. Cates, K.Y.  
501 DeLeon-Pennell, and M.L. Lindsey (2016) Temporal neutrophil polarization following myocardial  
502 infarction. *Cardiovasc Res.* **110**(1): p. 51-61.
- 503 23. Horckmans, M., L. Ring, J. Duchene, D. Santovito, M.J. Schloss, M. Drechsler, C. Weber, O.  
504 Soehnlein, and S. Steffens (2017) Neutrophils orchestrate post-myocardial infarction healing by  
505 polarizing macrophages towards a reparative phenotype. *Eur Heart J.* **38**(3): p. 187-197.
- 506 24. Lindsey, M.L., J.J. Saucerman, and K.Y. DeLeon-Pennell (2016) Knowledge gaps to understanding  
507 cardiac macrophage polarization following myocardial infarction. *Biochim Biophys Acta.*  
508 **1862**(12): p. 2288-2292.
- 509 25. Ran, J., H. Qiu, S. Sun, A. Yang, and L. Tian (2018) Are ambient volatile organic compounds  
510 environmental stressors for heart failure? *Environ Pollut.* **242**(Pt B): p. 1810-1816.
- 511 26. Bennett, O., N.B. Kandala, C. Ji, J. Linnane, and A. Clarke (2014) Spatial variation of heart failure  
512 and air pollution in Warwickshire, UK: an investigation of small scale variation at the ward-level.  
513 *BMJ Open.* **4**(12): p. e006028.
- 514 27. Tsai, D.H., J.L. Wang, K.J. Chuang, and C.C. Chan (2010) Traffic-related air pollution and  
515 cardiovascular mortality in central Taiwan. *Sci Total Environ.* **408**(8): p. 1818-1823.



- 516 28. Villeneuve, P.J., M. Jerrett, J. Su, R.T. Burnett, H. Chen, J. Brook, A.J. Wheeler, S. Cakmak, and  
517 M.S. Goldberg (2013) A cohort study of intra-urban variations in volatile organic compounds and  
518 mortality, Toronto, Canada. *Environ Pollut.* **183**: p. 30-39.
- 519 29. Baba, S.P., D. Zhang, M. Singh, S. Dassanayaka, Z. Xie, G. Jagatheesan, J. Zhao, V.K. Schmidtke,  
520 K.R. Brittan, M.L. Merchant, D.J. Conklin, S.P. Jones, and A. Bhatnagar (2018) Deficiency of  
521 aldose reductase exacerbates early pressure overload-induced cardiac dysfunction and  
522 autophagy in mice. *J Mol Cell Cardiol.* **118**: p. 183-192.
- 523 30. Lang, A.L., L. Chen, G.D. Poff, W.X. Ding, R.A. Barnett, G.E. Artee, and J.I. Beier (2018) Vinyl  
524 chloride dysregulates metabolic homeostasis and enhances diet-induced liver injury in mice.  
525 *Hepatol Commun.* **2**(3): p. 270-284.
- 526 31. Dassanayaka, S., Y. Zheng, A.A. Gibb, T.D. Cummins, L.A. McNally, K.R. Brittan, G. Jagatheesan,  
527 T.N. Audam, B.W. Long, R.E. Brainard, S.P. Jones, and B.G. Hill (2018) Cardiac-specific  
528 overexpression of aldehyde dehydrogenase 2 exacerbates cardiac remodeling in response to  
529 pressure overload. *Redox Biol.* **17**: p. 440-449.
- 530 32. An, O., K.T. Tan, Y. Li, J. Li, C.S. Wu, B. Zhang, L. Chen, and H. Yang (2020) CSI NGS Portal: An  
531 Online Platform for Automated NGS Data Analysis and Sharing. *Int J Mol Sci.* **21**(11).
- 532 33. Watson, L.J., H.T. Facundo, G.A. Ngoh, M. Ameen, R.E. Brainard, K.M. Lemma, B.W. Long, S.D.  
533 Prabhu, Y.T. Xuan, and S.P. Jones (2010) O-linked beta-N-acetylglucosamine transferase is  
534 indispensable in the failing heart. *Proc Natl Acad Sci U S A.* **107**(41): p. 17797-17802.
- 535 34. Watson, L.J., B.W. Long, A.M. DeMartino, K.R. Brittan, R.D. Readnower, R.E. Brainard, T.D.  
536 Cummins, L. Annamalai, B.G. Hill, and S.P. Jones (2014) Cardiomyocyte Ogt is essential for  
537 postnatal viability. *Am J Physiol Heart Circ Physiol.* **306**(1): p. H142-153.
- 538 35. Swamydas, M., Y. Luo, M.E. Dorf, and M.S. Lionakis (2015) Isolation of Mouse Neutrophils. *Curr*  
539 *Protoc Immunol.* **110**: p. 3 20 21-23 20 15.
- 540 36. Wilhelmsen, K., K. Farrar, and J. Hellman (2013) Quantitative in vitro assay to measure  
541 neutrophil adhesion to activated primary human microvascular endothelial cells under static  
542 conditions. *J Vis Exp.* 2013/09/03(78): p. e50677.
- 543 37. Swirski, F.K. and M. Nahrendorf (2018) Cardioimmunology: the immune system in cardiac  
544 homeostasis and disease. *Nat Rev Immunol.* **18**(12): p. 733-744.
- 545 38. Silvestre-Roig, C., Q. Braster, A. Ortega-Gomez, and O. Soehnlein (2020) Neutrophils as  
546 regulators of cardiovascular inflammation. *Nat Rev Cardiol.* **17**(6): p. 327-340.
- 547 39. Wang, Y., S. Sano, K. Oshima, M. Sano, Y. Watanabe, Y. Katanasaka, Y. Yura, C. Jung, A. Anzai,  
548 F.K. Swirski, N. Gokce, and K. Walsh (2019) Wnt5a-Mediated Neutrophil Recruitment Has an  
549 Obligatory Role in Pressure Overload-Induced Cardiac Dysfunction. *Circulation.* **140**(6): p. 487-  
550 499.
- 551 40. Frangogiannis, N.G. (2017) The extracellular matrix in myocardial injury, repair, and remodeling.  
552 *J Clin Invest.* **127**(5): p. 1600-1612.
- 553 41. Hutchinson, K.R., J.A. Stewart, Jr., and P.A. Lucchesi (2010) Extracellular matrix remodeling  
554 during the progression of volume overload-induced heart failure. *J Mol Cell Cardiol.* **48**(3): p.  
555 564-569.
- 556 42. Salvador, A.M., T. Nevers, F. Velazquez, M. Aronovitz, B. Wang, A. Abadia Molina, I.Z. Jaffe, R.H.  
557 Karas, R.M. Blanton, and P. Alcaide (2016) Intercellular Adhesion Molecule 1 Regulates Left  
558 Ventricular Leukocyte Infiltration, Cardiac Remodeling, and Function in Pressure Overload-  
559 Induced Heart Failure. *J Am Heart Assoc.* **5**(3): p. e003126.
- 560 43. Bliksoen, M., L.H. Mariero, M.K. Torp, A. Baysa, K. Ytrehus, F. Haugen, I. Seljeflot, J. Vaage, G.  
561 Valen, and K.O. Stenslokken (2016) Extracellular mtDNA activates NF-kappaB via toll-like  
562 receptor 9 and induces cell death in cardiomyocytes. *Basic Res Cardiol.* **111**(4): p. 42.

- 563 44. Lipps, C., J.H. Nguyen, L. Pyttel, T.L.t. Lynch, C. Liebetrau, G. Aleshcheva, S. Voss, O. Dorr, H.M.  
564 Nef, H. Mollmann, C.W. Hamm, S. Sadayappan, and C. Troidl (2016) N-terminal fragment of  
565 cardiac myosin binding protein-C triggers pro-inflammatory responses in vitro. *J Mol Cell Cardiol.*  
566 **99**: p. 47-56.
- 567 45. Krysko, D.V., P. Agostinis, O. Krysko, A.D. Garg, C. Bachert, B.N. Lambrecht, and P. Vandenabeele  
568 (2011) Emerging role of damage-associated molecular patterns derived from mitochondria in  
569 inflammation. *Trends Immunol.* **32**(4): p. 157-164.
- 570 46. Shioi, T., A. Matsumori, Y. Kihara, M. Inoko, K. Ono, Y. Iwanaga, T. Yamada, A. Iwasaki, K.  
571 Matsushima, and S. Sasayama (1997) Increased expression of interleukin-1 beta and monocyte  
572 chemotactic and activating factor/monocyte chemoattractant protein-1 in the hypertrophied  
573 and failing heart with pressure overload. *Circ Res.* **81**(5): p. 664-671.
- 574 47. Patel, B., S.S. Bansal, M.A. Ismahil, T. Hamid, G. Rokosh, M. Mack, and S.D. Prabhu (2018)  
575 CCR2(+) Monocyte-Derived Infiltrating Macrophages Are Required for Adverse Cardiac  
576 Remodeling During Pressure Overload. *JACC Basic Transl Sci.* **3**(2): p. 230-244.
- 577 48. Vandal, K., P. Rouleau, A. Boivin, C. Ryckman, M. Talbot, and P.A. Tessier (2003) Blockade of  
578 S100A8 and S100A9 suppresses neutrophil migration in response to lipopolysaccharide. *J*  
579 *Immunol.* **171**(5): p. 2602-2609.
- 580 49. Ryckman, C., K. Vandal, P. Rouleau, M. Talbot, and P.A. Tessier (2003) Proinflammatory activities  
581 of S100: proteins S100A8, S100A9, and S100A8/A9 induce neutrophil chemotaxis and adhesion.  
582 *J Immunol.* **170**(6): p. 3233-3242.
- 583 50. Morrow, D.A., Y. Wang, K. Croce, M. Sakuma, M.S. Sabatine, H. Gao, A.D. Pradhan, A.M. Healy, J.  
584 Buros, C.H. McCabe, P. Libby, C.P. Cannon, E. Braunwald, and D.I. Simon (2008) Myeloid-related  
585 protein 8/14 and the risk of cardiovascular death or myocardial infarction after an acute  
586 coronary syndrome in the Pravastatin or Atorvastatin Evaluation and Infection Therapy:  
587 Thrombolysis in Myocardial Infarction (PROVE IT-TIMI 22) trial. *Am Heart J.* **155**(1): p. 49-55.
- 588 51. Healy, A.M., M.D. Pickard, A.D. Pradhan, Y. Wang, Z. Chen, K. Croce, M. Sakuma, C. Shi, A.C.  
589 Zago, J. Garasic, A.I. Damokosh, T.L. Dowie, L. Poisson, J. Lillie, P. Libby, P.M. Ridker, and D.I.  
590 Simon (2006) Platelet expression profiling and clinical validation of myeloid-related protein-14  
591 as a novel determinant of cardiovascular events. *Circulation.* **113**(19): p. 2278-2284.
- 592 52. Ichikawa, M., R. Williams, L. Wang, T. Vogl, and G. Srikrishna (2011) S100A8/A9 activate key  
593 genes and pathways in colon tumor progression. *Mol Cancer Res.* **9**(2): p. 133-148.
- 594 53. Buonafina, M., E. Martinez-Martinez, C. Amador, B. Gravez, J. Ibarrola, A. Fernandez-Celis, S. El  
595 Moghrabi, P. Rossignol, N. Lopez-Andres, and F. Jaisser (2018) Neutrophil Gelatinase-Associated  
596 Lipocalin from immune cells is mandatory for aldosterone-induced cardiac remodeling and  
597 inflammation. *J Mol Cell Cardiol.* **115**: p. 32-38.
- 598 54. Marques, F.Z., P.R. Prestes, S.G. Byars, S.C. Ritchie, P. Wurtz, S.K. Patel, S.A. Booth, I. Rana, Y.  
599 Minoda, S.P. Berzins, C.L. Curl, J.R. Bell, B. Wai, P.M. Srivastava, A.J. Kangas, P. Soinenen, S.  
600 Ruohonen, M. Kahonen, T. Lehtimaki, E. Raitoharju, A. Havulinna, M. Perola, O. Raitakari, V.  
601 Salomaa, M. Ala-Korpela, J. Kettunen, M. McGlynn, J. Kelly, M.E. Wlodek, P.A. Lewandowski,  
602 L.M. Delbridge, L.M. Burrell, M. Inouye, S.B. Harrap, and F.J. Charchar (2017) Experimental and  
603 Human Evidence for Lipocalin-2 (Neutrophil Gelatinase-Associated Lipocalin [NGAL]) in the  
604 Development of Cardiac Hypertrophy and heart failure. *J Am Heart Assoc.* **6**(6).
- 605 55. Yndestad, A., T. Ueland, E. Oie, G. Florholmen, B. Halvorsen, H. Attramadal, S. Simonsen, S.S.  
606 Froland, L. Gullestad, G. Christensen, J.K. Damas, and P. Aukrust (2004) Elevated levels of activin  
607 A in heart failure: potential role in myocardial remodeling. *Circulation.* **109**(11): p. 1379-1385.
- 608 56. Yan, L., N. Borregaard, L. Kjeldsen, and M.A. Moses (2001) The high molecular weight urinary  
609 matrix metalloproteinase (MMP) activity is a complex of gelatinase B/MMP-9 and neutrophil

- 610 gelatinase-associated lipocalin (NGAL). Modulation of MMP-9 activity by NGAL. *J Biol Chem.*  
611 **276**(40): p. 37258-37265.
- 612 57. Nuntagawat, C., K. Leelawat, and R. Tohtong (2010) NGAL knockdown by siRNA in human  
613 cholangiocarcinoma cells suppressed invasion by reducing NGAL/MMP-9 complex formation.  
614 *Clin Exp Metastasis.* **27**(5): p. 295-305.
- 615 58. Boyd, J.H., B. Kan, H. Roberts, Y. Wang, and K.R. Walley (2008) S100A8 and S100A9 mediate  
616 endotoxin-induced cardiomyocyte dysfunction via the receptor for advanced glycation end  
617 products. *Circ Res.* **102**(10): p. 1239-1246.
- 618 59. Tang, W.H., M.L. Brennan, K. Philip, W. Tong, S. Mann, F. Van Lente, and S.L. Hazen (2006)  
619 Plasma myeloperoxidase levels in patients with chronic heart failure. *Am J Cardiol.* **98**(6): p. 796-  
620 799.
- 621 60. Ali, M., B. Pulli, G. Courties, B. Tricot, M. Sebas, Y. Iwamoto, I. Hilgendorf, S. Schob, A. Dong, W.  
622 Zheng, A. Skoura, A. Kalgukar, C. Cortes, R. Ruggeri, F.K. Swirski, M. Nahrendorf, L. Buckbinder,  
623 and J.W. Chen (2016) Myeloperoxidase Inhibition Improves Ventricular Function and  
624 Remodeling After Experimental Myocardial Infarction. *JACC Basic Transl Sci.* **1**(7): p. 633-643.
- 625 61. Griffith, J.W., C.L. Sokol, and A.D. Luster (2014) Chemokines and chemokine receptors:  
626 positioning cells for host defense and immunity. *Annu Rev Immunol.* **32**: p. 659-702.
- 627 62. Miyake, M., S. Goodison, V. Urquidi, E. Gomes Giacoia, and C.J. Rosser (2013) Expression of  
628 CXCL1 in human endothelial cells induces angiogenesis through the CXCR2 receptor and the  
629 ERK1/2 and EGF pathways. *Lab Invest.* **93**(7): p. 768-778.
- 630 63. Scapini, P., M. Morini, C. Tecchio, S. Minghelli, E. Di Carlo, E. Tanghetti, A. Albin, C. Lowell, G.  
631 Berton, D.M. Noonan, and M.A. Cassatella (2004) CXCL1/macrophage inflammatory protein-2-  
632 induced angiogenesis in vivo is mediated by neutrophil-derived vascular endothelial growth  
633 factor-A. *J Immunol.* **172**(8): p. 5034-5040.
- 634 64. Wang, L., Y.L. Zhang, Q.Y. Lin, Y. Liu, X.M. Guan, X.L. Ma, H.J. Cao, Y. Liu, J. Bai, Y.L. Xia, J. Du, and  
635 H.H. Li (2018) CXCL1-CXCR2 axis mediates angiotensin II-induced cardiac hypertrophy and  
636 remodelling through regulation of monocyte infiltration. *Eur Heart J.* **39**(20): p. 1818-1831.
- 637 65. Gillis, B., I.M. Gavin, Z. Arbieva, S.T. King, S. Jayaraman, and B.S. Prabhakar (2007) Identification  
638 of human cell responses to benzene and benzene metabolites. *Genomics.* **90**(3): p. 324-333.
- 639 66. Bironaite, D., D. Siegel, J.L. Moran, B.B. Weksler, and D. Ross (2004) Stimulation of endothelial  
640 IL-8 (eIL-8) production and apoptosis by phenolic metabolites of benzene in HL-60 cells and  
641 human bone marrow endothelial cells. *Chem Biol Interact.* **149**(2-3): p. 177-188.
- 642 67. Gerszten, R.E., E.A. Garcia-Zepeda, Y.C. Lim, M. Yoshida, H.A. Ding, M.A. Gimbrone, Jr., A.D.  
643 Luster, F.W. Lusinskas, and A. Rosenzweig (1999) MCP-1 and IL-8 trigger firm adhesion of  
644 monocytes to vascular endothelium under flow conditions. *Nature.* **398**(6729): p. 718-723.
- 645 68. Gomez-Pastor, R., E.T. Burchfiel, and D.J. Thiele (2018) Regulation of heat shock transcription  
646 factors and their roles in physiology and disease. *Nat Rev Mol Cell Biol.* **19**(1): p. 4-19.
- 647 69. Sakamoto, M., T. Minamino, H. Toko, Y. Kayama, Y. Zou, M. Sano, E. Takaki, T. Aoyagi, K. Tojo, N.  
648 Tajima, A. Nakai, H. Aburatani, and I. Komuro (2006) Upregulation of heat shock transcription  
649 factor 1 plays a critical role in adaptive cardiac hypertrophy. *Circ Res.* **99**(12): p. 1411-1418.
- 650 70. Zhou, N., Y. Ye, X. Wang, B. Ma, J. Wu, L. Li, L. Wang, D.W. Wang, and Y. Zou (2017) Heat shock  
651 transcription factor 1 protects against pressure overload-induced cardiac fibrosis via Smad3. *J*  
652 *Mol Med (Berl).* **95**(4): p. 445-460.
- 653 71. Du, P., Y. Chang, F. Dai, C. Wei, Q. Zhang, and J. Li (2018) Role of heat shock transcription factor  
654 1(HSF1)-upregulated macrophage in ameliorating pressure overload-induced heart failure in  
655 mice. *Gene.* **667**: p. 10-17.
- 656 72. Zou, Y., J. Li, H. Ma, H. Jiang, J. Yuan, H. Gong, Y. Liang, A. Guan, J. Wu, L. Li, N. Zhou, Y. Niu, A.  
657 Sun, A. Nakai, P. Wang, H. Takano, I. Komuro, and J. Ge (2011) Heat shock transcription factor 1

- 658 protects heart after pressure overload through promoting myocardial angiogenesis in male  
659 mice. *J Mol Cell Cardiol.* **51**(5): p. 821-829.
- 660 73. Uchiyama, T., H. Atsuta, T. Utsugi, M. Oguri, A. Hasegawa, T. Nakamura, A. Nakai, M. Nakata, I.  
661 Maruyama, H. Tomura, F. Okajima, S. Tomono, S. Kawazu, R. Nagai, and M. Kurabayashi (2007)  
662 HSF1 and constitutively active HSF1 improve vascular endothelial function (heat shock proteins  
663 improve vascular endothelial function). *Atherosclerosis.* **190**(2): p. 321-329.
- 664 74. Takii, R., S. Inouye, M. Fujimoto, T. Nakamura, T. Shinkawa, R. Prakasam, K. Tan, N. Hayashida,  
665 H. Ichikawa, T. Hai, and A. Nakai (2010) Heat shock transcription factor 1 inhibits expression of  
666 IL-6 through activating transcription factor 3. *J Immunol.* **184**(2): p. 1041-1048.  
667

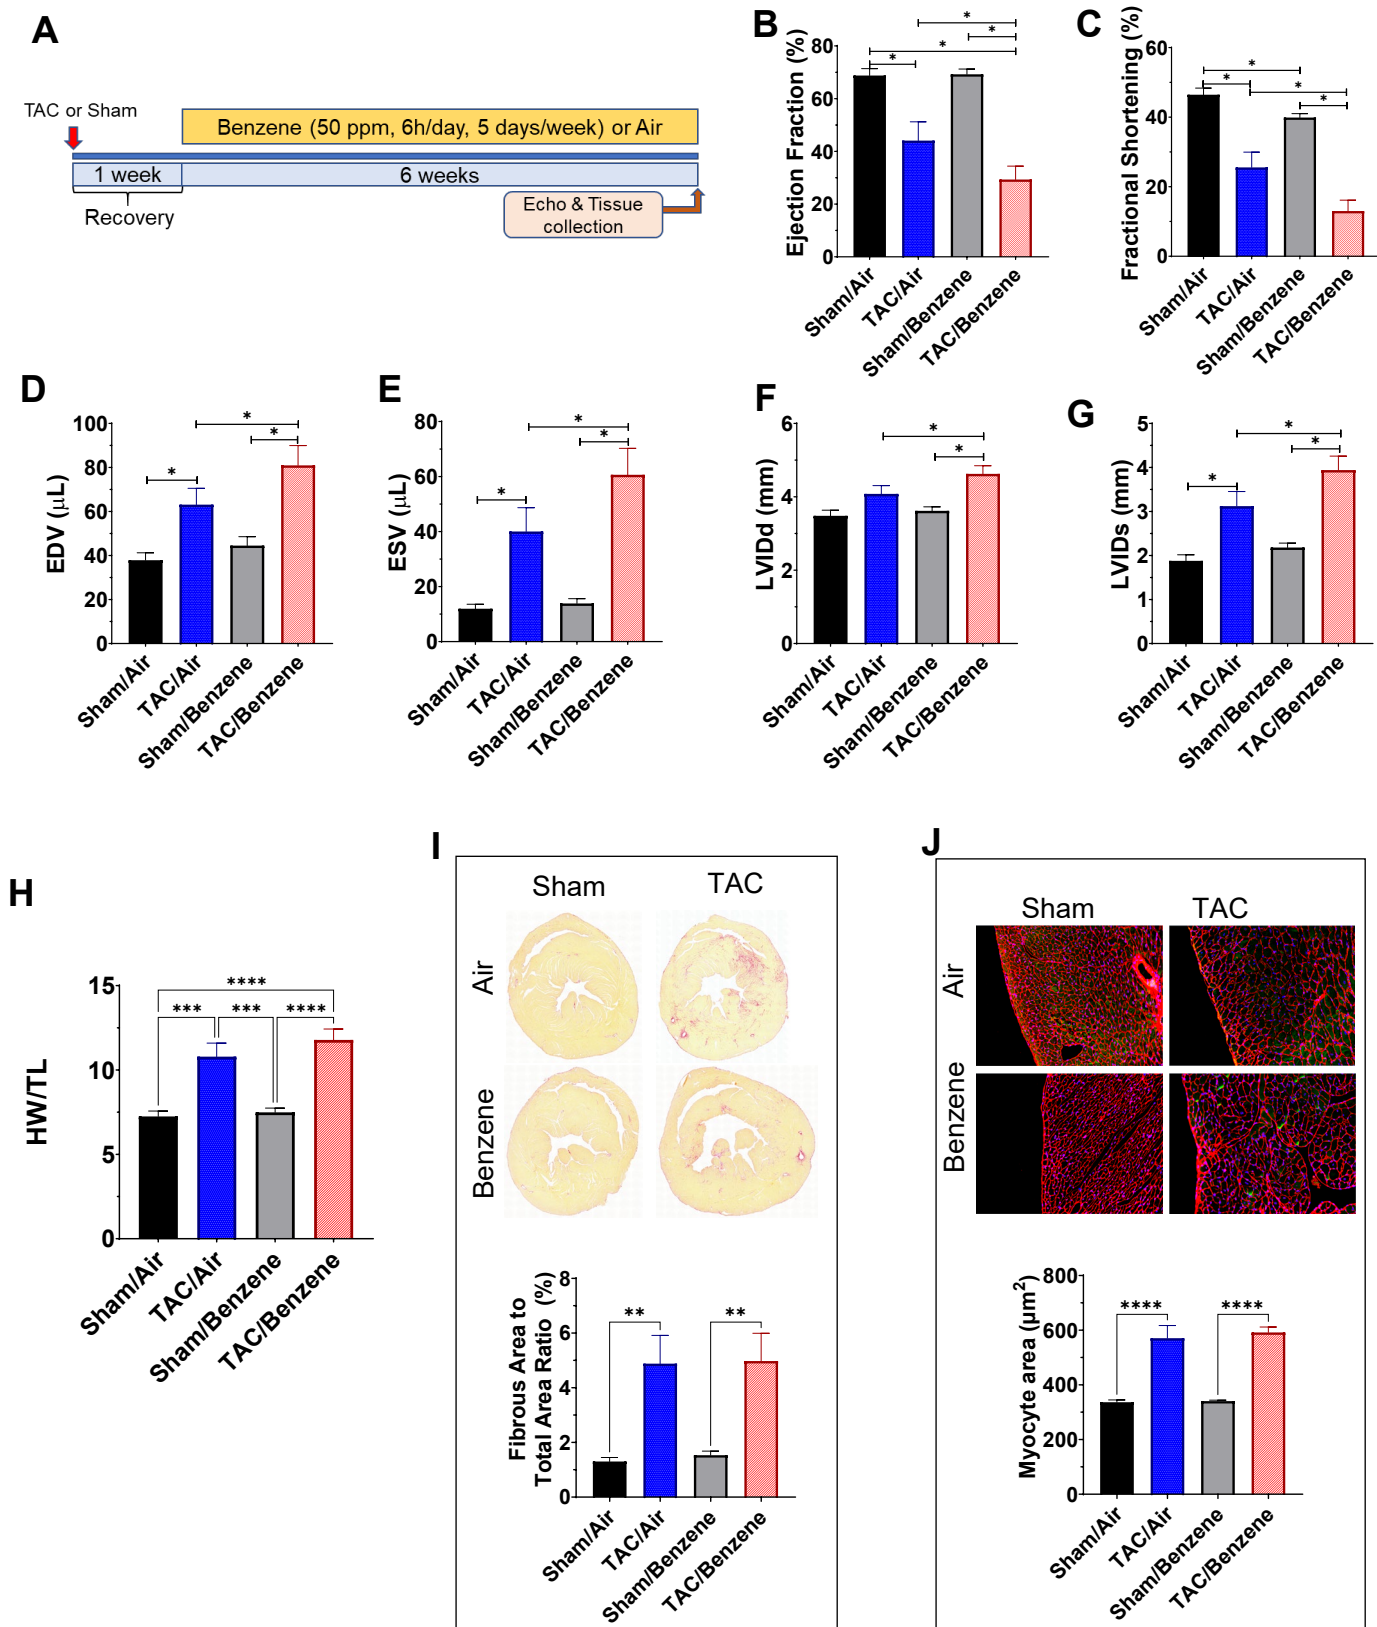

**A**

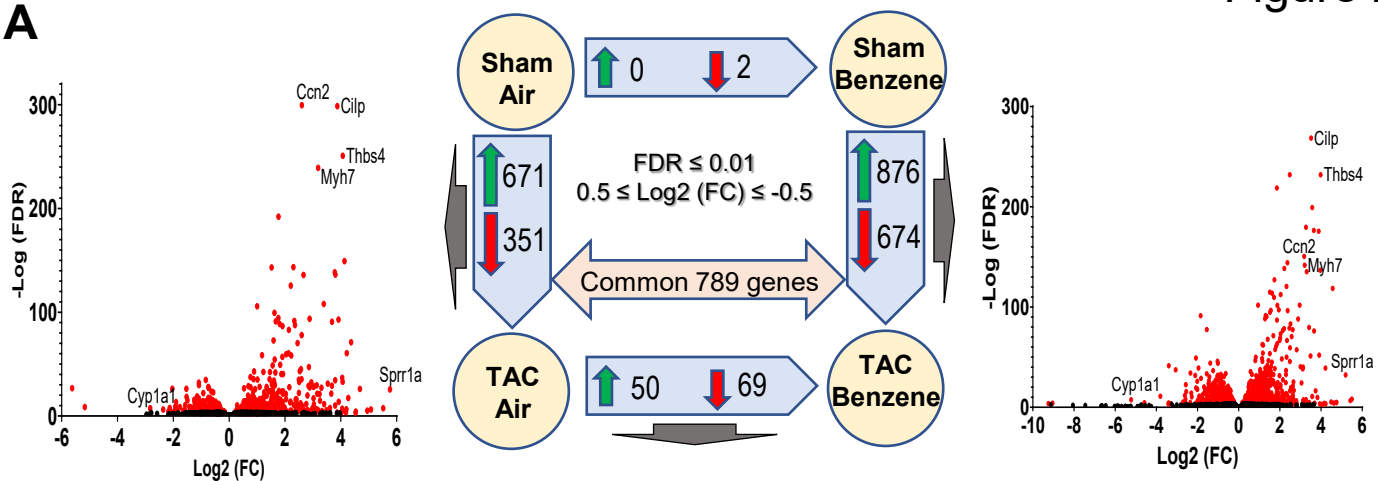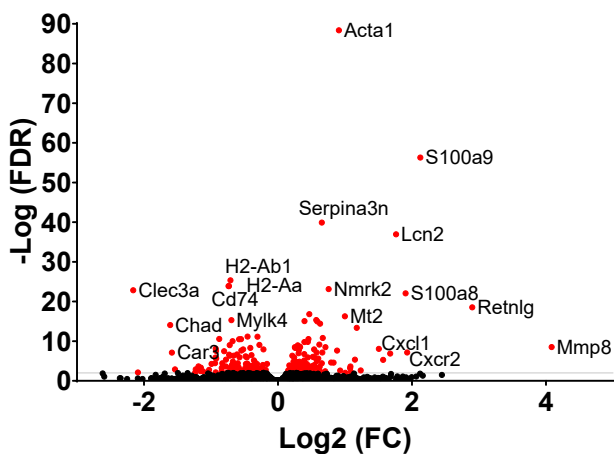

**B**

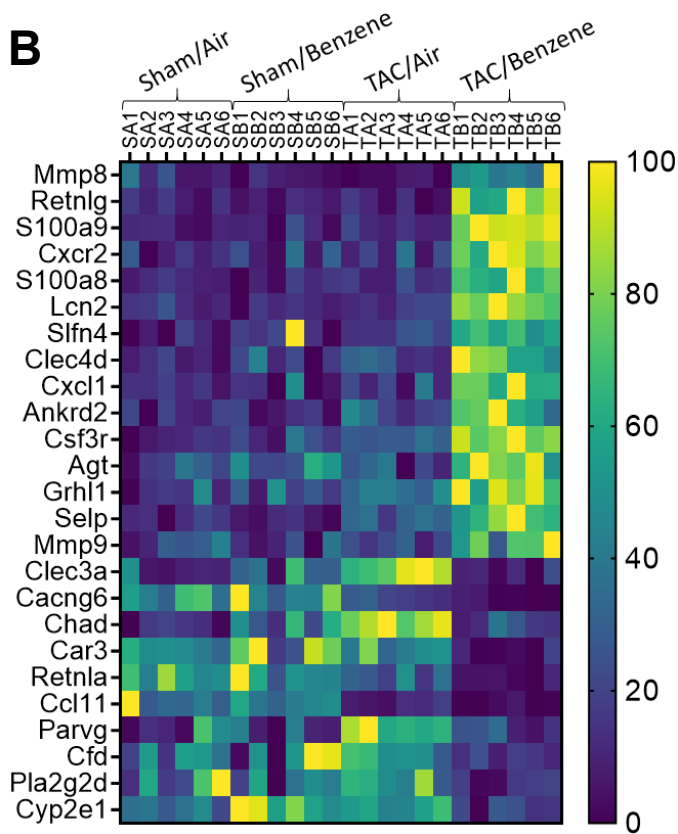

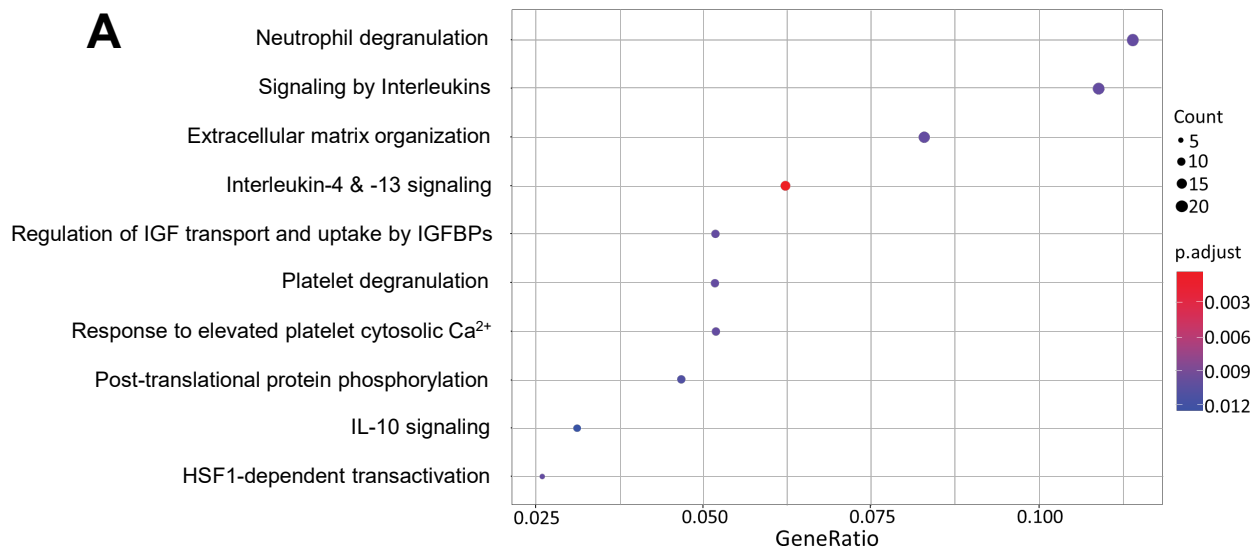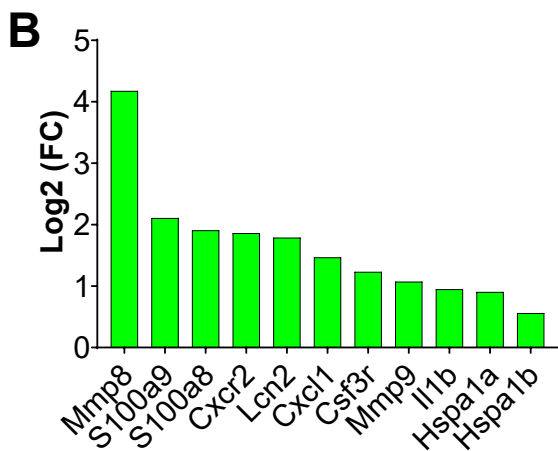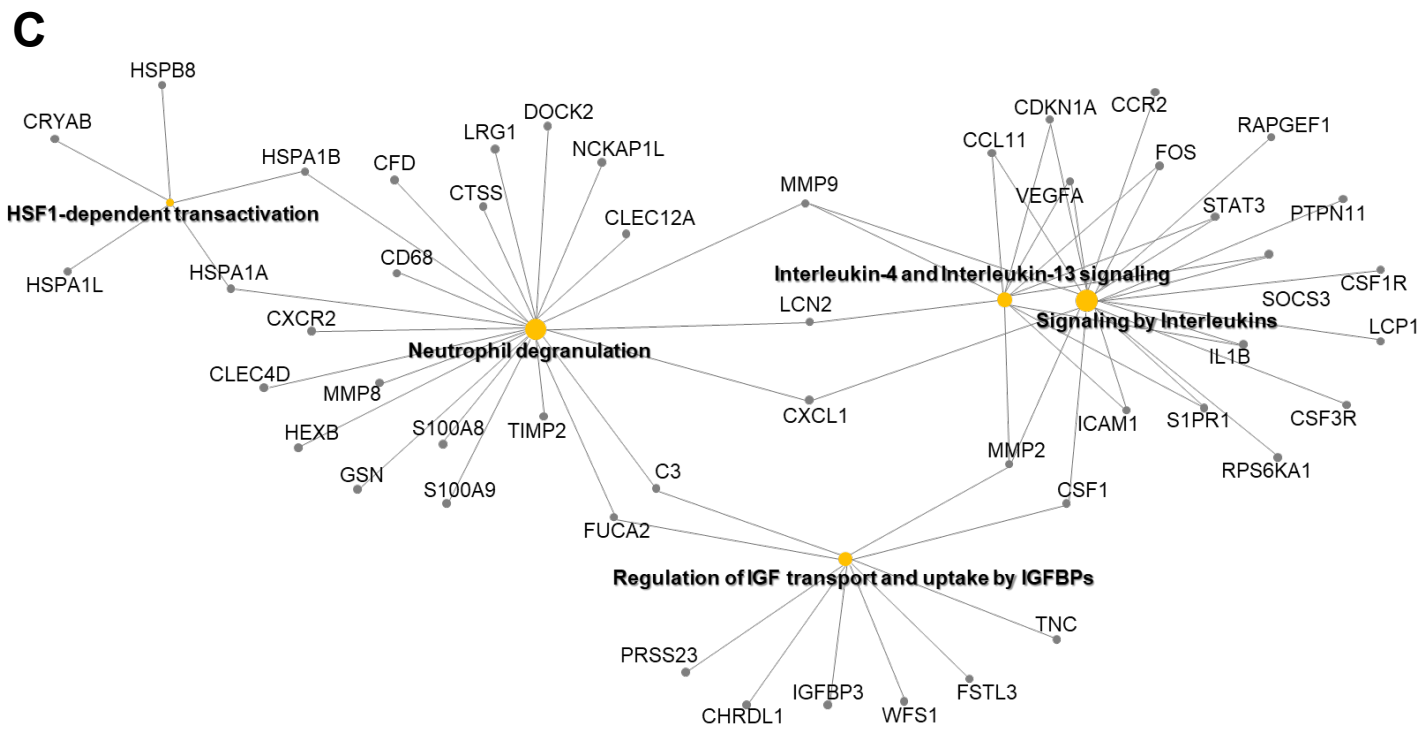

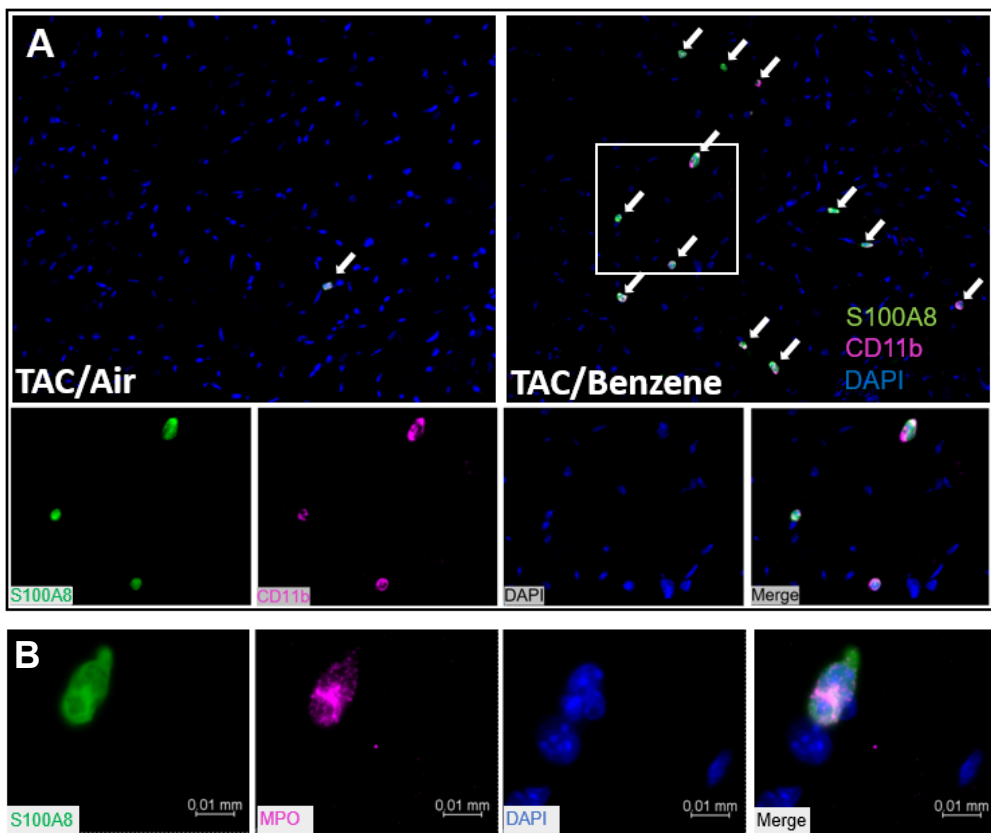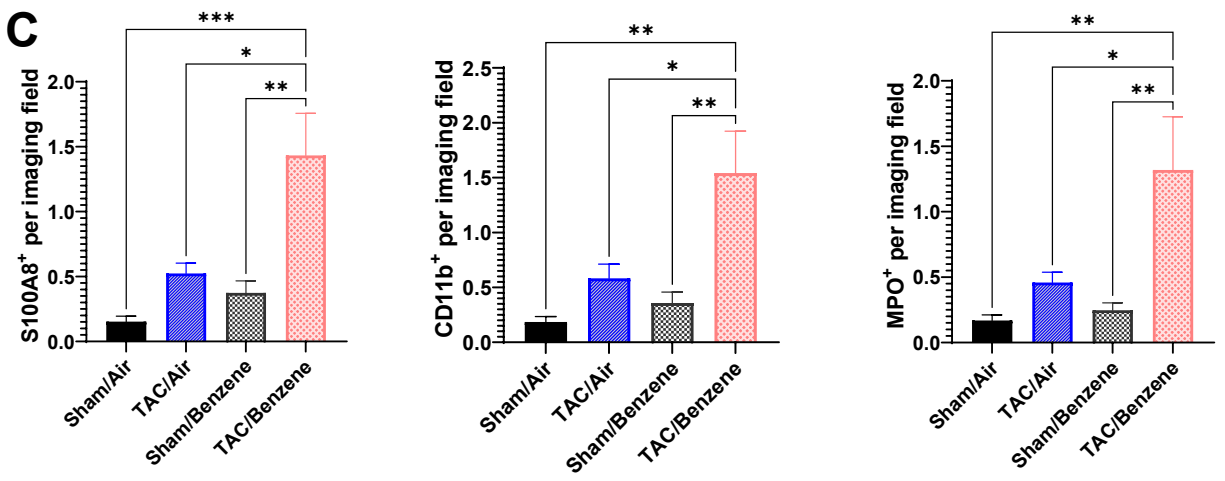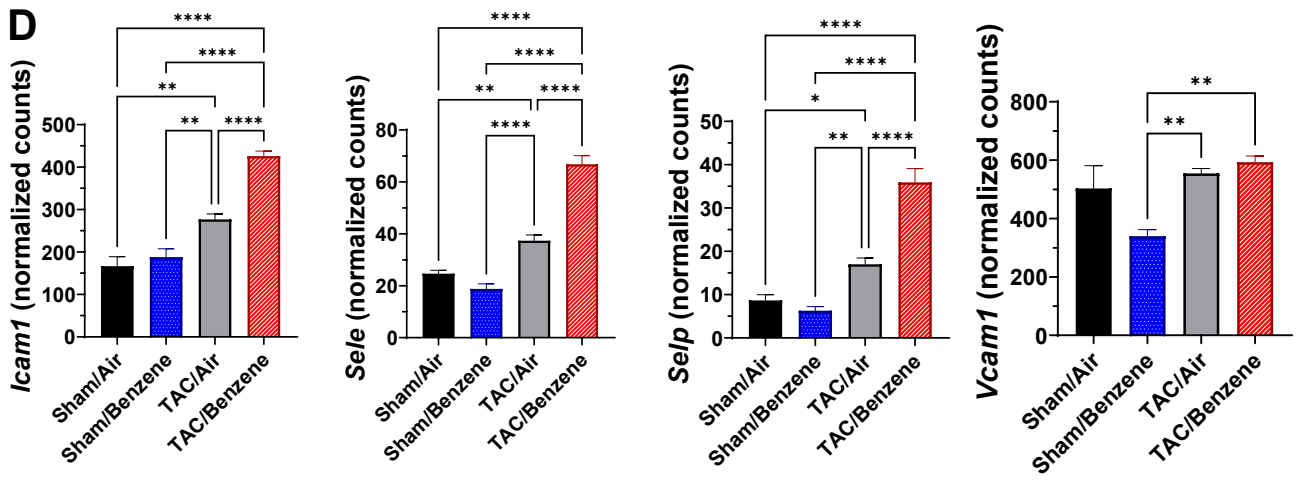



Figure 5

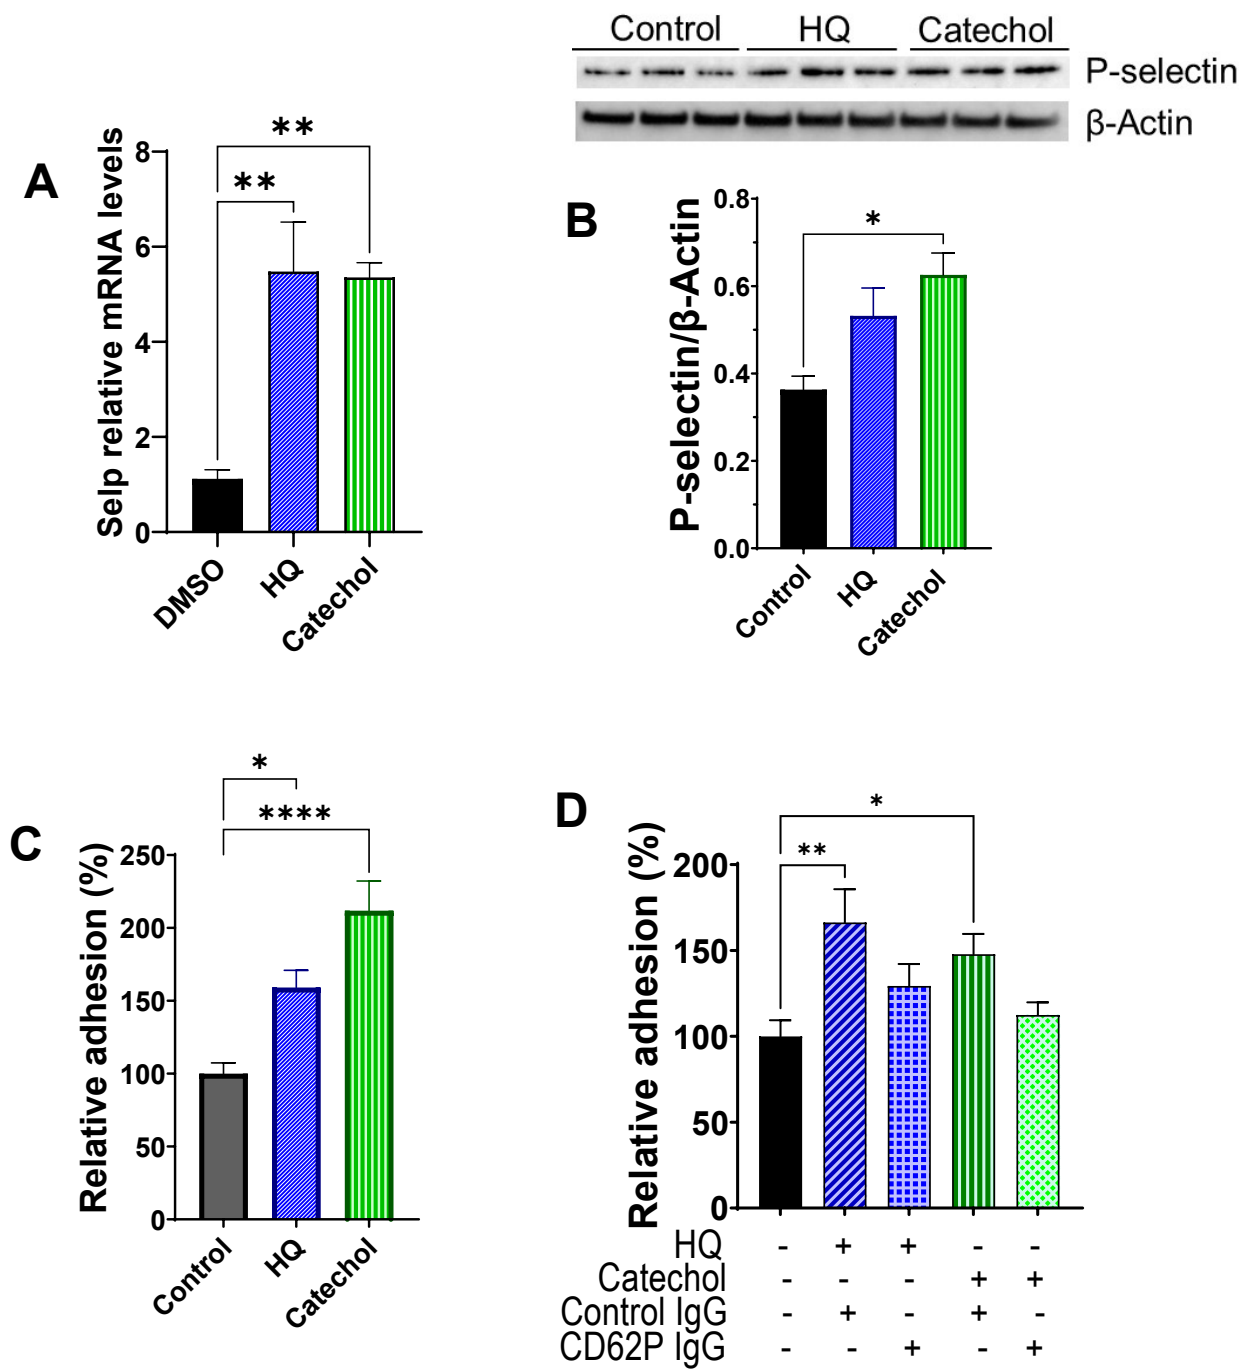

**Supplementary Table 1.** *Echocardiographic parameters of transverse aortic constriction or sham operated mice followed by benzene or air exposure for 6 weeks.*

| <b>Parameters</b> | <b>Sham/Air</b> | <b>Sham/Benzene</b> | <b>TAC/Air</b>          | <b>TAC/Benzene</b>       |
|-------------------|-----------------|---------------------|-------------------------|--------------------------|
| IVRT (ms)         | 11.1 ± 0.6      | 12.6 ± 0.7          | 16.2 ± 2.0              | 17.8 ± 2.3*              |
| LVAWd (mm)        | 1.3 ± 0.1       | 1.2 ± 0.03          | 1.4 ± 0.04 <sup>§</sup> | 1.4 ± 0.07               |
| LVAWs (mm)        | 1.9 ± 0.07      | 1.8 ± 0.04          | 1.8 ± 0.06              | 1.7 ± 0.09               |
| LVPWd (mm)        | 1.1 ± 0.04      | 1.0 ± 0.05          | 1.3 ± 0.1 <sup>§</sup>  | 1.2 ± 0.06               |
| LVPWs (mm)        | 1.8 ± 0.06      | 1.5 ± 0.06          | 1.6 ± 0.09              | 1.5 ± 0.09*              |
| HR (bpm)          | 534 ± 11        | 514 ± 12            | 523 ± 9                 | 549 ± 9                  |
| Endo CO (mL/min)  | 13.7 ± 1.01     | 15.6 ± 1.21         | 12.1 ± 0.98             | 11.2 ± 1.03 <sup>§</sup> |
| SV (μL)           | 25.9 ± 2.3      | 30.6 ± 2.7          | 23.1 ± 1.9              | 20.3 ± 1.7 <sup>§</sup>  |

Values are mean ± SEM. N=10-12 per group. \*p ≤ 0.05 vs Sham/Air, <sup>§</sup>p ≤ 0.05 vs Sham/Benzene. Statistical analyses were performed by One-way ANOVA.

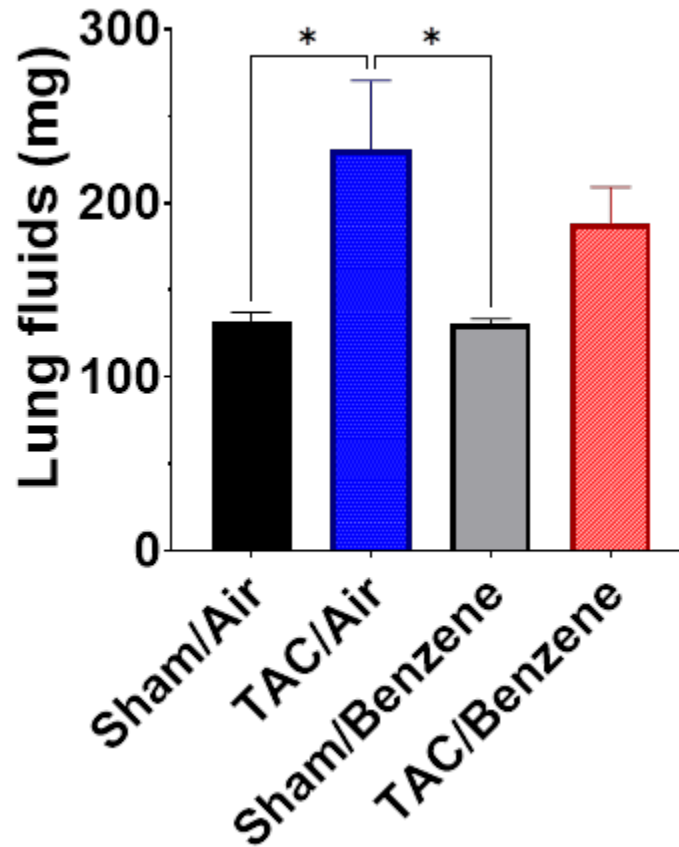

**Supplementary Figure 1.** *Pulmonary edema in transverse aortic constriction or Sham operated mice exposed to benzene or air for 6 weeks.* Accumulation of the fluid in the lung was measured by subtracting the dry weight of the tissue from the wet weight. Values are mean  $\pm$  SEM, N=10-12 per group. \* $p < 0.05$  between corresponding groups. Statistical analyses were performed by One-way ANOVA.

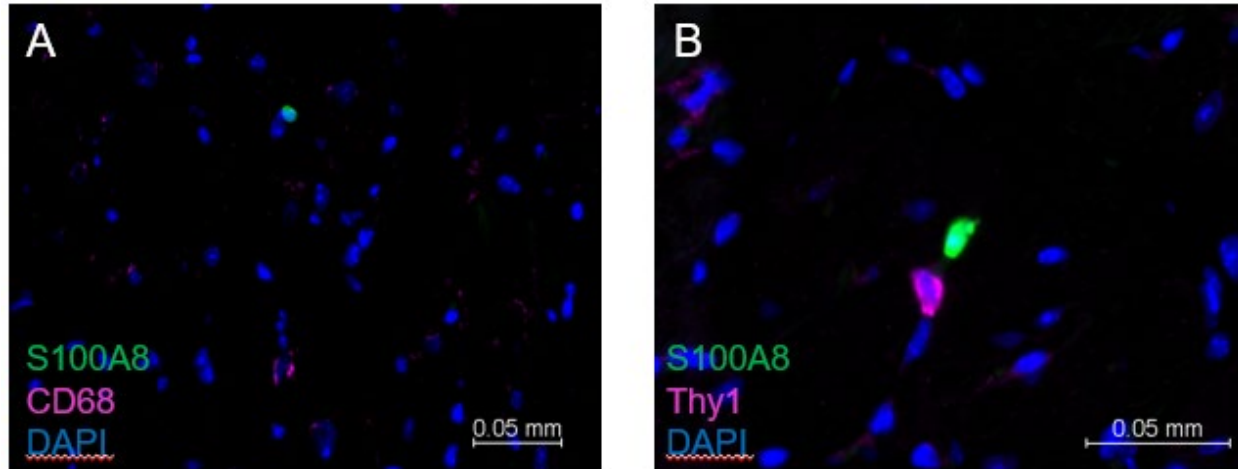

**Supplementary Figure 2.** *Staining of immune cells in the hearts of TAC/Benzene-exposed mice.* Hearts from the TAC/Benzene mice were stained with granulocyte marker S100A8, macrophage marker CD68, or fibroblast marker Thy1. Nuclei were stained with DAPI (blue).

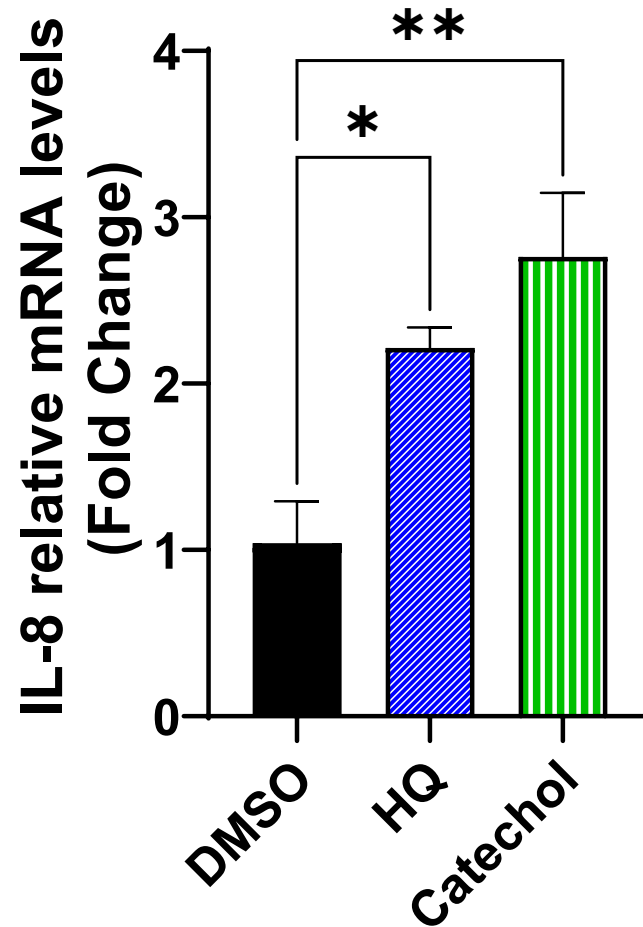

**Supplementary Figure 3.** Expression of chemokine IL8 in hydroquinone (HQ, 5  $\mu$ M/24h) and catechol cardiac (5  $\mu$ M/24h)-treated cardiac microvascular endothelial cells. Values are mean  $\pm$  SEM, N=3 per group. \* $p$ <0.05, \*\* $p$ <0.01 between corresponding groups. Statistical analyses were performed by One-way ANOVA.
